# Supplementary material for: Plasma Levels of Proprotein Convertase Subtilisin/Kexin Type 9 Are Inversely Associated with N-Terminal Pro B-Type Natriuretic Peptide in Older Men and Women
Source: MDPI journal article supplement (doi:10.3390/biomedicines10081961), 2022-08-12
Supplement: s1 [file s1]

## Supplementary Materials

**Table S1.** General characteristics according to NT-proBNP tertiles.

| <i>Clinical characteristics</i>             | <b>1st NT-proBNP<br/>tertile (n° 54)</b> | <b>2nd NT-proBNP<br/>tertile (n° 53)</b> | <b>3rd NT-proBNP<br/>tertile (n° 53)</b> | <i>p</i> |
|---------------------------------------------|------------------------------------------|------------------------------------------|------------------------------------------|----------|
| Age (years)                                 | 85.0 ± 6.5                               | 89.2 ± 4.3                               | 90.6 ± 4.6                               | <0.001   |
| Sex (female)                                | 54.0%                                    | 64.0%                                    | 71.4%                                    | 0.196    |
| GIC (high comorbidity)                      | 59.2%                                    | 75.5%                                    | 80.9%                                    | 0.048    |
| ADL Hierarchy Scale: Assistance<br>required | 42.9%                                    | 55.1%                                    | 68.1%                                    | 0.077    |
| ADL Hierarchy Scale: Dependence             | 20.4%                                    | 12.2%                                    | 4.3%                                     |          |
| History of Hypertension                     | 67.3%                                    | 66.7%                                    | 79.2%                                    | 0.315    |
| Type 2 Diabetes Mellitus                    | 20.4%                                    | 22.9%                                    | 20.8%                                    | 0.950    |
| History of CAD                              | 8.2%                                     | 16.7%                                    | 14.6%                                    | 0.432    |
| History of chronic HF                       | 18.4%                                    | 37.5%                                    | 64.6%                                    | <0.001   |
| Previous TIA/Stroke                         | 12.2%                                    | 16.7%                                    | 18.8%                                    | 0.669    |
| Cognitive impairment                        | 32.7%                                    | 56.3%                                    | 50.0%                                    | 0.054    |
| <i>Lab parameters</i>                       |                                          |                                          |                                          |          |
| TC (mg/dL)                                  | 161.1 ± 38.8                             | 150.1 ± 40.9                             | 143.0 ± 34.2                             | 0.090    |
| HDL-C (mg/dL)                               | 46.9 ± 17.9                              | 45.8 ± 17.0                              | 43.9 ± 14.6                              | 0.699    |
| LDL-C (mg/dL)                               | 91.2 ± 29.8                              | 81.0 ± 31.2                              | 77.2 ± 30.0                              | 0.095    |
| Non-HDL-C (mg/dl)                           | 104.7 ± 37.2                             | 98.7 ± 34.3                              | 104.3 ± 38.5                             | 0.674    |
| (Non-HDL-C + Non-LDL-C)                     | 21.5 (16.3-23.0)                         | 20.0 (14.0-27.5)                         | 19.0 (15.0-28.0)                         | 0.415    |
| Triglycerides (mg/dL)                       | 107.5 (83.0-117.0)                       | 98.5 (70.8-137.5)                        | 96.0 (73.0-137.0)                        | 0.666    |
| NT-proBNP (pg/mL)                           | 491 (353-821)                            | 2434 (1748-3311)                         | 7552 (5397-12267)                        | <0.001   |
| Hgb (g/dL)                                  | 11.6 ± 1.7                               | 11.2 ± 2.2                               | 11.3 ± 1.5                               | 0.526    |
| eGFR (ml/min/1.73 m <sup>2</sup> )          | 62.4 ± 24.4                              | 55.8 ± 22.6                              | 40.6 ± 20.8                              | <0.001   |
| Glycaemia (mg/dL)                           | 112.0 (89.0-140.5)                       | 102.0 (85.0-135.5)                       | 101.0 (81.5-141.5)                       | 0.480    |
| Albumin (g/dL)                              | 3.4 ± 0.5                                | 3.2 ± 0.6                                | 3.3 ± 0.6                                | 0.158    |

GIC: Geriatric Index of Comorbidity; ADL: Activities of Daily Living; CAD: Coronary Artery Disease; HF: Heart Failure; TIA: Transient Ischemic Attack; TC: Total Cholesterol; HDL-C: High-Density Lipoprotein Cholesterol; LDL-C: Low-Density Lipoprotein Cholesterol; NT-proBNP: N-terminal pro B-Type Natriuretic Peptide; Hgb: Hemoglobin; eGFR: estimated Glomerular Filtration Rate.

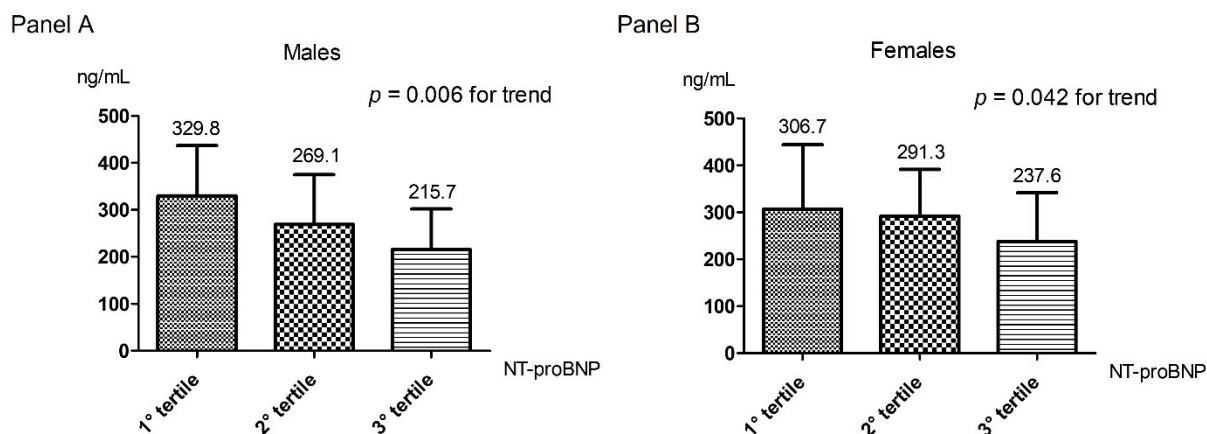

**Figure S1.** PCSK9 levels according to NT-proBNP tertiles in males (Panel A) and females (Panel B).
